# Supplementary material for: The p97-UBXD8 complex regulates ER-Mitochondria contact sites by altering membrane lipid saturation and composition
Source: PubMed Central journal article supplement (PMC9902492; doi:10.1038/s41467-023-36298-2), 2023-02-06
Supplement: 41467_2023_36298_MOESM3_ESM.pdf [file 41467_2023_36298_MOESM3_ESM.pdf]

**File name: Supplementary Dataset 1**

**Description:** Quantitative TMT proteomic data of post-nuclear supernatants and MAM fractions.

**File name: Supplementary Dataset 2**

**Description:** Lipidomic data of whole cell lysates and MAM fractions.
